# Supplementary material for: Gegenees: Fragmented Alignment of Multiple Genomes for Determining Phylogenomic Distances and Genetic Signatures Unique for Specified Target Groups
Source: PubMed Central journal article supplement (PMC3377601; doi:10.1371/journal.pone.0039107), 2012-06-18
Supplement: pone.0039107.s001.pdf [file pone.0039107.s001.pdf]

Artemis Entry Edit: 3\_Bacillus\_anthraxis\_str.'Ames\_Ancestor'\_chromosome\_complete\_genome..MaxMin.gbk

File Entries Select View Goto Edit Create Run Graph Display

Entry:  3\_Bacillus\_anthraxis\_str.'Ames\_Ancestor'\_chromosome\_complete\_genome..MaxMin.gbk

Selected feature: bases 369 amino acids 122 GBAA\_1672 (/locus\_tag="GBAA\_1672" /codon\_start=1 /transl\_table=11 /product="flagellar protein FliS" /p

>>  
<<

gk GBAA\_1672 yC fliH GBAA\_1673 iE GBAA\_1683 GBAA\_1687 GBAA\_1692 GBAA\_1695 GBAA\_1697 GBAA\_1704 GBAA\_1706 GBAA\_1707 fli

fliD fliG fliI GBAA\_1697 GBAA\_1704 GBAA\_1706 GBAA\_1707 fli

misc\_feature mi misc feature : feature : e : misc\_feature : ture : isc feature : ature : ture : e mi misc\_feature mi misc feature : e misc fe: misc\_fea i misc feature

77400 |1579600 |1581800 |1584000 |1586200 |1588400 |1590600 |1592800 |1595000 |1597200 |1599400 |1601600 |1603800 |1606000 |1608200 |1610400

<<  
>>

|              |         |         |                                        |
|--------------|---------|---------|----------------------------------------|
| fliD         | 1579866 | 1581218 | flagellar capping protein              |
| misc_feature | 1580401 | 1580700 |                                        |
| misc_feature | 1580601 | 1581100 |                                        |
| misc_feature | 1581001 | 1581200 |                                        |
| misc_feature | 1581101 | 1581300 |                                        |
| misc_feature | 1581201 | 1581400 |                                        |
| GBAA_1672    | 1581241 | 1581609 | flagellar protein FliS                 |
| misc_feature | 1581301 | 1581600 |                                        |
| misc_feature | 1581501 | 1582100 |                                        |
| GBAA_1673    | 1581599 | 1581871 | hypothetical protein                   |
| misc_feature | 1582001 | 1582600 |                                        |
| flgB         | 1582241 | 1582648 | flagellar basal-body rod protein FlgB  |
| misc_feature | 1582501 | 1583100 |                                        |
| flgC         | 1582669 | 1583082 | flagellar basal body rod protein FlgC  |
| misc_feature | 1583001 | 1583500 |                                        |
| fliE         | 1583099 | 1583398 | flagellar hook-basal body protein FliE |
| misc_feature | 1583401 | 1583900 |                                        |
