# Supplementary material for: Gegenees: Fragmented Alignment of Multiple Genomes for Determining Phylogenomic Distances and Genetic Signatures Unique for Specified Target Groups
Source: PubMed Central journal article supplement (PMC3377601; doi:10.1371/journal.pone.0039107), 2012-06-18

Reference organism: *Bacillus anthracis*\_Ames\_Ancestor\_

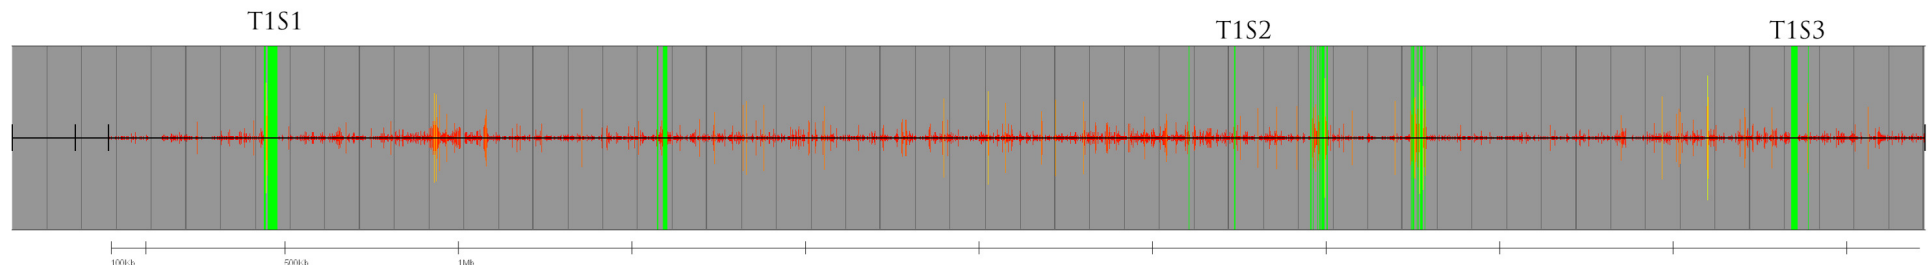

Reference organism: *Bacillus anthracis*\_Ames\_Ancestor\_

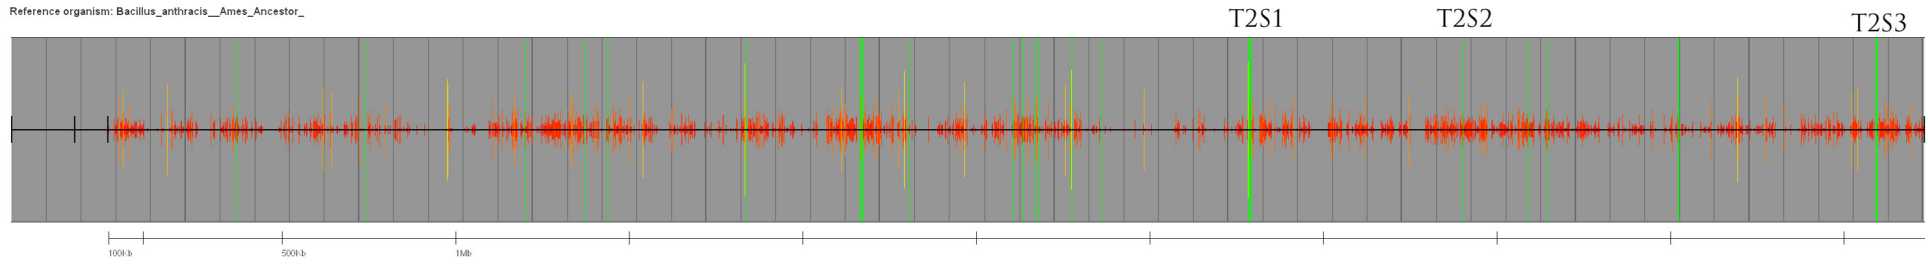

Reference organism: *Bacillus cereus*\_ATCC\_10987

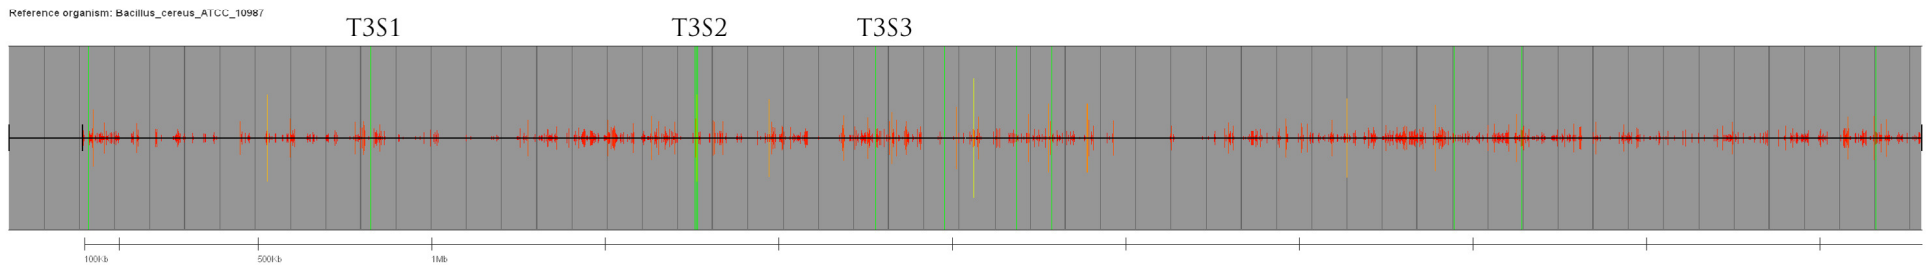

Reference organism: *Bacillus cereus*\_B4264

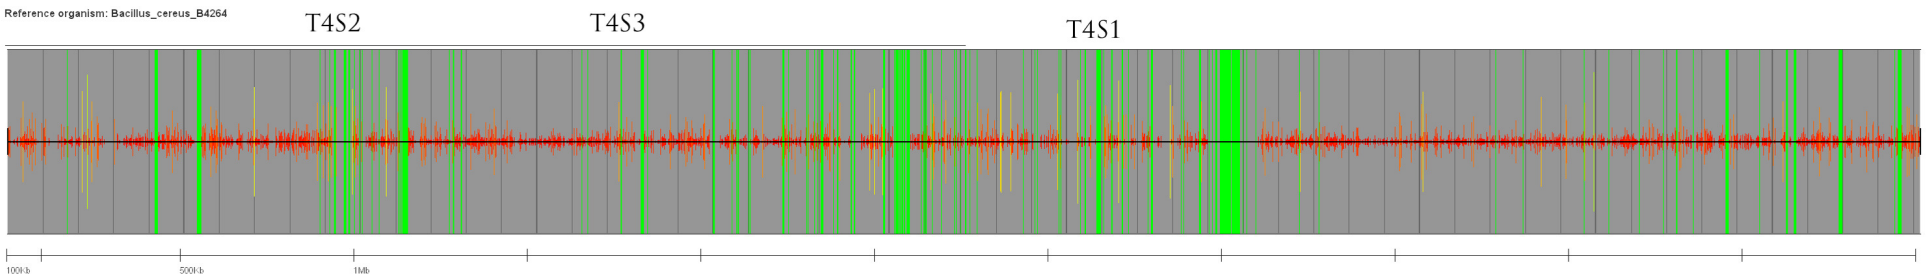

Reference organism: *Bacillus weihenstephanensis*\_KBAB4

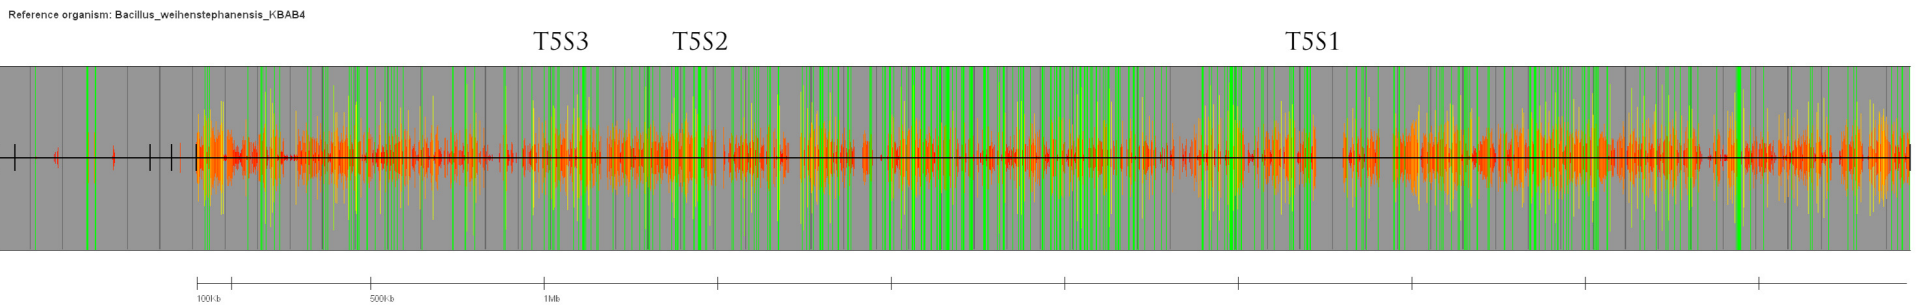

Supplement: pone.0039107.s005.pdf [file pone.0039107.s005.pdf]
