# Supplementary material for: Gegenees: Fragmented Alignment of Multiple Genomes for Determining Phylogenomic Distances and Genetic Signatures Unique for Specified Target Groups
Source: PubMed Central journal article supplement (PMC3377601; doi:10.1371/journal.pone.0039107), 2012-06-18

0.01

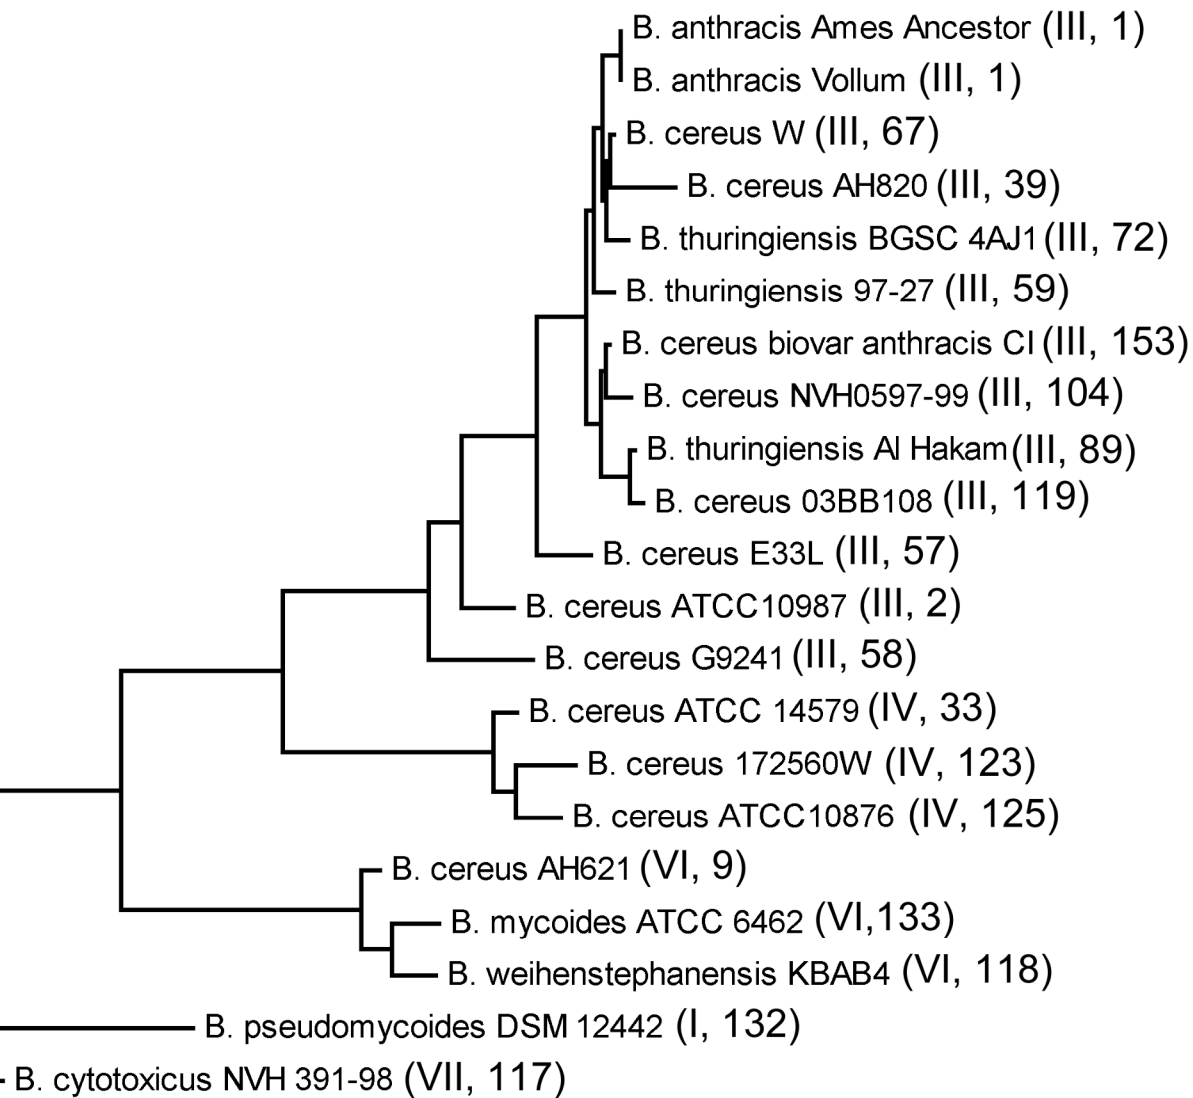

Supplement: pone.0039107.s008.pdf [file pone.0039107.s008.pdf]
