# Supplementary material for: Gegenees: Fragmented Alignment of Multiple Genomes for Determining Phylogenomic Distances and Genetic Signatures Unique for Specified Target Groups
Source: PubMed Central journal article supplement (PMC3377601; doi:10.1371/journal.pone.0039107), 2012-06-18
Supplement: pone.0039107.s010.pdf [file pone.0039107.s010.pdf]

## Supplemental Table S1

A list of *Bacillus* Spp. genomes and their accession numbers used in Figure 3A

| Genome                                             | State    | No. of. subsequences/contigs | NCBI accession number                                            |
|----------------------------------------------------|----------|------------------------------|------------------------------------------------------------------|
| Bacillus cereus W                                  | Draft    | 102                          | NZ_ABCZ                                                          |
| Bacillus weihenstephanensis KBAB4                  | Complete | 5                            | NC_010183, NC_010180, NC_010182, NC_010181, NC_010184            |
| Bacillus cereus ATCC 10987                         | Complete | 2                            | NC_005707, NC_003909                                             |
| Bacillus cereus ATCC 14579                         | Complete | 2                            | NC_004721, NC_004722                                             |
| Bacillus anthracis Ames Ancestor                   | Complete | 3                            | NC_007322, NC_007323, NC_007530                                  |
| Bacillus cereus AH820                              | Complete | 4                            | NC_011776, NC_011771, NC_011777, NC_011773                       |
| Bacillus thuringiensis serovar monterrey BGSC 4AJ1 | Draft    | 250                          | NZ_ACNE                                                          |
| Bacillus cereus ATCC 10876                         | Draft    | 245                          | NZ_ACLT                                                          |
| Bacillus cereus 03BB108                            | Draft    | 66                           | NZ_ABDM                                                          |
| Bacillus cereus NVH0597 99                         | Draft    | 71                           | NZ_ABDK                                                          |
| Bacillus anthracis Vollum                          | Draft    | 52                           | NZ_AAEP                                                          |
| Bacillus thuringiensis serovar konkukian 97 27     | Complete | 2                            | NC_005957, NC_006578                                             |
| Bacillus thuringiensis Al Hakam                    | Complete | 2                            | NC_008598, NC_008600                                             |
| Bacillus cereus G9241                              | Draft    | 207                          | NZ_AAEK                                                          |
| Bacillus pseudomycoides DSM 12442                  | Draft    | 305                          | NZ_ACMX                                                          |
| Bacillus cytotoxicus NVH 391 98                    | Complete | 2                            | NC_009674, NC_009673                                             |
| Bacillus cereus 172560W                            | Draft    | 152                          | NZ_ACLV                                                          |
| Bacillus cereus AH621                              | Draft    | 190                          | NZ_ACLX                                                          |
| Bacillus cereus biovar anthracis CI                | Complete | 4                            | NC_014331, NC_014332, NC_014335, NC_014333                       |
| Bacillus cereus E33L                               | Complete | 6                            | NC_007103, NC_007106, NC_007104, NC_007105, NC_007107, NC_006274 |
| Bacillus mycoides ATCC 6462                        | Draft    | 200                          | NZ_ACMU                                                          |
