# Supplementary material for: Gegenees: Fragmented Alignment of Multiple Genomes for Determining Phylogenomic Distances and Genetic Signatures Unique for Specified Target Groups
Source: PubMed Central journal article supplement (PMC3377601; doi:10.1371/journal.pone.0039107), 2012-06-18
Supplement: pone.0039107.s011.pdf [file pone.0039107.s011.pdf]

**Supplemental Table S2**  
**A list of yeast genomes and their accession numbers used in Figure 3B**

| Genome                               | State    | No. of subsequences/contigs | NCBI accession number                                                                                                                                                                     |
|--------------------------------------|----------|-----------------------------|-------------------------------------------------------------------------------------------------------------------------------------------------------------------------------------------|
| Ashbya gossypii ATCC 10895           | Complete | 8                           | NC_005782, NC_005783, NC_005784, NC_005785, NC_005786, NC_005787, NC_005788, NC_005789                                                                                                    |
| Candida glabrata                     | Complete | 14                          | NC_004691, NC_005967, NC_005968, NC_006026, NC_006027, NC_006028, NC_006029, NC_006030, NC_006031, NC_006032, NC_006033, NC_006034, NC_006035, NC_006036                                  |
| Candida albicans SC5314              | Draft    | 413                         | AACQ                                                                                                                                                                                      |
| Debaryomyces hansenii CBS767         | Complete | 8                           | NC_006043, NC_006044, NC_006045, NC_006046, NC_006047, NC_006048, NC_006049, NC_010166                                                                                                    |
| Kluyveromyces lactis NRRL Y-1140     | Complete | 7                           | NC_006037, NC_006038, NC_006039, NC_006040, NC_006041, NC_006042, NC_006077                                                                                                               |
| Kluyveromyces waltii NCYC 2644       | Draft    | 713                         | AADM                                                                                                                                                                                      |
| Lachancea kluyveri NRRL Y 12651      | Draft    | 36                          | AACE                                                                                                                                                                                      |
| Naumovozyma castellii CBS 4309       | Complete | 10                          | NC_016491, NC_016500, NC_016492, NC_016493, NC_016494, NC_016495, NC_016496, NC_016497, NC_016498, NC_016499                                                                              |
| Saccharomyces cerevisiae             | Complete | 17                          | NC_001133, NC_001134, NC_001135, NC_001136, NC_001137, NC_001138, NC_001139, NC_001140, NC_001141, NC_001142, NC_001143, NC_001144, NC_001145, NC_001146, NC_001147, NC_001148, NC_001224 |
| Saccharomyces bayanus MCYC 623       | Draft    | 1098                        | AACA                                                                                                                                                                                      |
| Saccharomyces kudriavzevii IFO 1802  | Draft    | 2029                        | AACI                                                                                                                                                                                      |
| Saccharomyces mikatae IFO 1815       | Draft    | 1648                        | AABZ                                                                                                                                                                                      |
| Saccharomyces paradoxus NRRL Y 17217 | Draft    | 832                         | AABY                                                                                                                                                                                      |
| Yarrowia lipolytica CLIB122          | Complete | 7                           | NC_002659, NC_006067, NC_006068, NC_006069, NC_006070, NC_006071, NC_006072                                                                                                               |
