# Supplementary material for: Gegenees: Fragmented Alignment of Multiple Genomes for Determining Phylogenomic Distances and Genetic Signatures Unique for Specified Target Groups
Source: PubMed Central journal article supplement (PMC3377601; doi:10.1371/journal.pone.0039107), 2012-06-18
Supplement: pone.0039107.s012.pdf [file pone.0039107.s012.pdf]

Supplemental Table S3

A list of *Bacillus* Spp. genomes used in the *Bacillus* comparison. Target groups (T1-T5) are also indicated.

| Target group for PCR 1-5, 0 = background | Genome                                                   | State    | No. of. subsequences/contigs | NCBI accession number                                            |
|------------------------------------------|----------------------------------------------------------|----------|------------------------------|------------------------------------------------------------------|
| 1,2                                      | Bacillus anthracis A1055                                 | Draft    | 42                           | NZ_AAEO                                                          |
| 1,2                                      | Bacillus anthracis CDC 684                               | Complete | 3                            | NC_012579, NC_012581, NC_012577                                  |
| 1,2                                      | Bacillus anthracis CNEVA 9066                            | Draft    | 30                           | NZ_AAEN                                                          |
| 1,2                                      | Bacillus anthracis A0174                                 | Draft    | 60                           | NZ_ABLT                                                          |
| 1,2                                      | Bacillus anthracis A0442                                 | Draft    | 46                           | NZ_ABKG                                                          |
| 1,2                                      | Bacillus anthracis Ames Ancestor                         | Complete | 3                            | NC_007322, NC_007323, NC_007530                                  |
| 1,2                                      | Bacillus anthracis Australia 94                          | Draft    | 49                           | NZ_AAES                                                          |
| 1,2                                      | Bacillus anthracis A0389                                 | Draft    | 68                           | NZ_ABLB                                                          |
| 1,2                                      | Bacillus anthracis Kruger B                              | Draft    | 64                           | NZ_AAEO                                                          |
| 1,2                                      | Bacillus anthracis Tsiankovskii I                        | Draft    | 62                           | NZ_ABDN                                                          |
| 1,2                                      | Bacillus anthracis Sterne                                | Complete | 1                            | NC_005945                                                        |
| 1,2                                      | Bacillus anthracis Ames                                  | Complete | 1                            | NC_003997                                                        |
| 1,2                                      | Bacillus anthracis Vollum                                | Draft    | 52                           | NZ_AAEP                                                          |
| 1,2                                      | Bacillus anthracis A0488                                 | Draft    | 63                           | NZ_ABJC                                                          |
| 1,2                                      | Bacillus anthracis A0193                                 | Draft    | 60                           | NZ_ABKF                                                          |
| 1,2                                      | Bacillus anthracis A0465                                 | Draft    | 57                           | NZ_ABLH                                                          |
| 1,2                                      | Bacillus anthracis A0248                                 | Complete | 3                            | NC_012655, NC_012659, NC_012656                                  |
| 1,2                                      | Bacillus anthracis A2012                                 | Draft    | 1                            | NZ_AAAC                                                          |
| 1,2                                      | Bacillus anthracis Western North America USA6153         | Draft    | 44                           | NZ_AAER                                                          |
| 2                                        | Bacillus cereus 03BB102                                  | Complete | 2                            | NC_012472, NC_012473                                             |
| 2                                        | Bacillus cereus 03BB108                                  | Draft    | 66                           | NZ_ABDM                                                          |
| 2                                        | Bacillus cereus 95 8201                                  | Draft    | 228                          | NZ_ACMF                                                          |
| 2                                        | Bacillus cereus AH620                                    | Complete | 4                            | NC_011776, NC_011771, NC_011777, NC_011773                       |
| 2                                        | Bacillus cereus BGSC 6E1                                 | Draft    | 202                          | NZ_ACLU                                                          |
| 2                                        | Bacillus cereus biovar anthracis CI                      | Complete | 4                            | NC_014331, NC_014332, NC_014335, NC_014333                       |
| 2                                        | Bacillus cereus E33L                                     | Complete | 6                            | NC_007103, NC_007106, NC_007104, NC_007105, NC_007107, NC_006274 |
| 2                                        | Bacillus cereus NVH0597 99                               | Draft    | 71                           | NZ_ABDK                                                          |
| 2                                        | Bacillus cereus SJ1                                      | Draft    | 254                          | NZ_ADFM                                                          |
| 2                                        | Bacillus cereus W                                        | Draft    | 102                          | NZ_ABCZ                                                          |
| 2                                        | Bacillus thuringiensis Al Hakam                          | Complete | 2                            | NC_008598, NC_008600                                             |
| 2                                        | Bacillus thuringiensis serovar andalousiensis BGSC 4AW1  | Draft    | 257                          | NZ_ACNG                                                          |
| 2                                        | Bacillus thuringiensis serovar konkukian 97 27           | Complete | 2                            | NC_005957, NC_006578                                             |
| 2                                        | Bacillus thuringiensis serovar monterrey BGSC 4AJ1       | Draft    | 250                          | NZ_ACNE                                                          |
| 2                                        | Bacillus thuringiensis serovar pondicheriensis BGSC 4BA1 | Draft    | 185                          | NZ_ACNH                                                          |
| 2                                        | Bacillus thuringiensis serovar pulsisiensis BGSC 4CC1    | Draft    | 258                          | NZ_ACNJ                                                          |
| 2                                        | Bacillus cereus Rock3 42                                 | Draft    | 192                          | NZ_ACMK                                                          |
| 3                                        | Bacillus cereus ATCC 4342                                | Draft    | 105                          | NZ_ACLZ                                                          |
| 3                                        | Bacillus thuringiensis serovar tochiensis BGSC 4Y1       | Draft    | 219                          | NZ_ACMY                                                          |
| 3                                        | Bacillus cereus AH187                                    | Complete | 5                            | NC_011654, NC_011658, NC_011657, NC_011656, NC_011655            |
| 3                                        | Bacillus cereus ATCC 10987                               | Complete | 2                            | NC_005707, NC_003909                                             |
| 3                                        | Bacillus cereus G9241                                    | Draft    | 207                          | NZ_AA EK                                                         |
| 3                                        | Bacillus cereus Q1                                       | Complete | 3                            | NC_011971, NC_011969, NC_011973                                  |
| 3                                        | Bacillus cereus BDRD ST26                                | Draft    | 182                          | NZ_ACMC                                                          |
| 3                                        | Bacillus cereus H3081 97                                 | Draft    | 80                           | NZ_ABDL                                                          |
| 3                                        | Bacillus cereus m1293                                    | Draft    | 241                          | NZ_ACLS                                                          |
| 4                                        | Bacillus cereus 172560W                                  | Draft    | 152                          | NZ_ACLV                                                          |
| 4                                        | Bacillus cereus AH676                                    | Draft    | 315                          | NZ_ACMQ                                                          |
| 4                                        | Bacillus cereus ATCC 10876                               | Draft    | 245                          | NZ_ACLT                                                          |
| 4                                        | Bacillus cereus ATCC 14579                               | Complete | 2                            | NC_004721, NC_004722                                             |
| 4                                        | Bacillus cereus B4264                                    | Complete | 1                            | NC_011725                                                        |
| 4                                        | Bacillus cereus BDRD Cer4                                | Draft    | 117                          | NZ_ACM E                                                         |
| 4                                        | Bacillus cereus BDRD ST24                                | Draft    | 185                          | NZ_ACM B                                                         |
| 4                                        | Bacillus cereus F65185                                   | Draft    | 267                          | NZ_ACM O                                                         |
| 4                                        | Bacillus thuringiensis BMB171                            | Complete | 2                            | NC_014171, NC_014172                                             |
| 4                                        | Bacillus thuringiensis Bt407                             | Draft    | 187                          | NZ_ACM Z                                                         |
| 4                                        | Bacillus thuringiensis IBL 200                           | Draft    | 244                          | NZ_ACM K                                                         |
| 4                                        | Bacillus thuringiensis IBL 4222                          | Draft    | 383                          | NZ_ACM L                                                         |
| 4                                        | Bacillus thuringiensis serovar berliner ATCC 10792       | Draft    | 253                          | NZ_ACM F                                                         |
| 4                                        | Bacillus thuringiensis serovar huazhongensis BGSC 4BD1   | Draft    | 278                          | NZ_ACM I                                                         |
| 4                                        | Bacillus thuringiensis serovar israelensis ATCC 35646    | Draft    | 866                          | NZ_AA JM                                                         |
| 4                                        | Bacillus thuringiensis serovar kurstaki T03a001          | Draft    | 337                          | NZ_ACM D                                                         |
| 4                                        | Bacillus thuringiensis serovar pakistani T13001          | Draft    | 617                          | NZ_ACM C                                                         |
| 4                                        | Bacillus thuringiensis serovar sotto T04001              | Draft    | 481                          | NZ_ACM B                                                         |
| 4                                        | Bacillus thuringiensis serovar T01001                    | Draft    | 246                          | NZ_ACM A                                                         |
| 4                                        | Bacillus cereus AH1134                                   | Draft    | 37                           | NZ_ABD A                                                         |
| 4                                        | Bacillus cereus G9842                                    | Complete | 3                            | NC_011775, NC_011774, NC_011772                                  |

|   |                                        |          |      |                                                                                        |
|---|----------------------------------------|----------|------|----------------------------------------------------------------------------------------|
| 4 | Bacillus cereus m1550                  | Draft    | 124  | NZ_ACMA                                                                                |
| 4 | Bacillus cereus Rock1 15               | Draft    | 199  | NZ_ACMH                                                                                |
| 4 | Bacillus cereus Rock4 2                | Draft    | 323  | NZ_ACMH                                                                                |
| 5 | Bacillus cereus AH603                  | Draft    | 251  | NZ_ACMH                                                                                |
| 5 | Bacillus cereus AH621                  | Draft    | 190  | NZ_ACLX                                                                                |
| 5 | Bacillus mycoides DSM 2048             | Draft    | 200  | NZ_ACMU                                                                                |
| 5 | Bacillus weihenstephanensis KBAB4      | Complete | 5    | NC_010183, NC_010180, NC_010182, NC_010181, NC_010184                                  |
| 5 | Bacillus cereus BDRD ST196             | Draft    | 284  | NZ_ACMD                                                                                |
| 0 | Bacillus 2 A 57 CT2                    | Draft    | 114  | NZ_ACWD                                                                                |
| 0 | Bacillus cereus MM3                    | Draft    | 197  | NZ_ACLW                                                                                |
| 0 | Bacillus amyloliquefaciens DSM 7       | Complete | 1    | NC_014551                                                                              |
| 0 | Bacillus amyloliquefaciens FZB42       | Complete | 1    | NC_009725                                                                              |
| 0 | Bacillus atrophaeus 1013-1             | Draft    | 28   | AEFS                                                                                   |
| 0 | Bacillus atrophaeus 1013-2             | Draft    | 28   | AEFT                                                                                   |
| 0 | Bacillus atrophaeus 1942               | Complete | 1    | NC_014639                                                                              |
| 0 | Bacillus atrophaeus ATCC 49822-1       | Draft    | 31   | AEFV                                                                                   |
| 0 | Bacillus atrophaeus ATCC 49822-2       | Draft    | 30   | AEFW                                                                                   |
| 0 | Bacillus atrophaeus ATCC 9372-1        | Draft    | 28   | AEFM                                                                                   |
| 0 | Bacillus atrophaeus ATCC 9372-2        | Draft    | 32   | AEFU                                                                                   |
| 0 | Bacillus atrophaeus BACI051-E          | Draft    | 35   | AEFX                                                                                   |
| 0 | Bacillus atrophaeus BACI051-N          | Draft    | 78   | AEFY                                                                                   |
| 0 | Bacillus atrophaeus Detrick-1          | Draft    | 31   | AEFP                                                                                   |
| 0 | Bacillus atrophaeus Detrick-2          | Draft    | 47   | AEFQ                                                                                   |
| 0 | Bacillus atrophaeus Detrick-3          | Draft    | 30   | AEFR                                                                                   |
| 0 | Bacillus atrophaeus str. Dugway        | Draft    | 53   | AEFO                                                                                   |
| 0 | Bacillus B14905                        | Draft    | 99   | NZ_AAXV                                                                                |
| 0 | Bacillus BT1B CT2                      | Draft    | 49   | NZ_ACWC                                                                                |
| 0 | Bacillus cellulolyticus DSM 2522       | Complete | 1    | NC_014829                                                                              |
| 0 | Bacillus cereus AH1272                 | Draft    | 416  | NZ_ACMS                                                                                |
| 0 | Bacillus cereus AH1273                 | Draft    | 412  | NZ_ACMT                                                                                |
| 0 | Bacillus clausii KSM K16               | Complete | 1    | NC_006582                                                                              |
| 0 | Bacillus coagulans 2 6                 | Complete | 1    | NC_015634                                                                              |
| 0 | Bacillus coagulans 36D1                | Complete | 1    | NC_016023                                                                              |
| 0 | Bacillus coagulans XZL4                | Draft    | 232  | AFWM                                                                                   |
| 0 | Bacillus coahuilensis m4 4             | Draft    | 138  | NZ_ABFU                                                                                |
| 0 | Bacillus cytotoxicus NVH 391 98        | Complete | 2    | NC_009674, NC_009673                                                                   |
| 0 | Bacillus halodurans C 125              | Complete | 1    | NC_002570                                                                              |
| 0 | Bacillus licheniformis ATCC 14580      | Complete | 1    | NC_006270                                                                              |
| 0 | Bacillus m3 13                         | Draft    | 50   | NZ_ACPC                                                                                |
| 0 | Bacillus megaterium DSM319             | Complete | 1    | NC_014103                                                                              |
| 0 | Bacillus megaterium QM B1551           | Complete | 8    | NC_010009, NC_014023, NC_014025, NC_010008, NC_010010, NC_014031, NC_004604, NC_014019 |
| 0 | Bacillus NRRL B 14911                  | Draft    | 109  | NZ_AAOX                                                                                |
| 0 | Bacillus pumilus ATCC 7061             | Draft    | 16   | NZ_ABRX                                                                                |
| 0 | Bacillus pumilus SAFR 032              | Complete | 1    | NC_009848                                                                              |
| 0 | Bacillus selentireducens MLS10         | Complete | 1    | NC_014219                                                                              |
| 0 | Bacillus SG 1                          | Draft    | 186  | NZ_ABCF                                                                                |
| 0 | Bacillus subtilis 168                  | Complete | 1    | NC_000964                                                                              |
| 0 | Bacillus subtilis 168                  | Draft    | 5    | NZ_ABOK                                                                                |
| 0 | Bacillus subtilis BSn5                 | Complete | 1    | NC_014976                                                                              |
| 0 | Bacillus subtilis gIP20b               | Draft    | 88   | AEHM                                                                                   |
| 0 | Bacillus subtilis JH642                | Draft    | 9    | NZ_ABQM                                                                                |
| 0 | Bacillus subtilis NCIB 3610            | Draft    | 84   | NZ_ABOL                                                                                |
| 0 | Bacillus subtilis SMY                  | Draft    | 9    | NZ_ABQN                                                                                |
| 0 | Bacillus subtilis spizizenii ATCC 6633 | Draft    | 37   | NZ_ADGS                                                                                |
| 0 | Bacillus subtilis spizizenii TU B 10   | Complete | 1    | NC_016047                                                                              |
| 0 | Bacillus subtilis spizizenii W23       | Complete | 1    | NC_014479                                                                              |
| 0 | Bacillus tusciae DSM 2912              | Complete | 1    | NC_014098                                                                              |
| 0 | Bacillus cereus R309803                | Draft    | 227  | NZ_ACLY                                                                                |
| 0 | Bacillus mycoides Rock1 4              | Draft    | 611  | NZ_ACMV                                                                                |
| 0 | Bacillus mycoides Rock3 17             | Draft    | 311  | NZ_ACMW                                                                                |
| 0 | Bacillus pseudofirmus OF4              | Complete | 3    | NC_013792, NC_013793, NC_013791                                                        |
| 0 | Bacillus pseudomycolides DSM 12442     | Draft    | 305  | NZ_ACMX                                                                                |
| 0 | Bacillus cereus AH1271                 | Draft    | 367  | NZ_ACMR                                                                                |
| 0 | Bacillus cereus Rock1 3                | Draft    | 171  | NZ_ACMG                                                                                |
| 0 | Bacillus cereus Rock3 28               | Draft    | 1149 | NZ_ADMI                                                                                |
| 0 | Bacillus cereus Rock3 29               | Draft    | 187  | NZ_ACMJ                                                                                |
| 0 | Bacillus cereus Rock3 44               | Draft    | 1055 | NZ_ACLM                                                                                |
| 0 | Bacillus cereus Rock4 18               | Draft    | 176  | NZ_ACMN                                                                                |
