# Supplementary material for: Gegenees: Fragmented Alignment of Multiple Genomes for Determining Phylogenomic Distances and Genetic Signatures Unique for Specified Target Groups
Source: PubMed Central journal article supplement (PMC3377601; doi:10.1371/journal.pone.0039107), 2012-06-18
Supplement: pone.0039107.s013.pdf [file pone.0039107.s013.pdf]

**Supplemental Table S4**

Templates and PCR results from the *Bacillus* Spp. target groups T1-T5. The target groups are listed in Supplemental Table S3.

| WGS | Strain name (culture collection ID of acquired strain)            | T1 |    |    | T2 |    |    | T3 |    |    | T4 |    |    | T5 |    |    |
|-----|-------------------------------------------------------------------|----|----|----|----|----|----|----|----|----|----|----|----|----|----|----|
|     |                                                                   | S1 | S2 | S3 | S1 | S2 | S3 | S1 | S2 | S3 | S1 | S2 | S3 | S1 | S2 | S3 |
| wgs | <i>Bacillus anthracis</i> Vollum (NCTC 10340)                     | +  | +  | +  | +  | +  | +  | -  | -  | -  | -  | -  | -  | -  | -  | -  |
| wgs | <i>Bacillus cereus</i> (BGSC 6E1)                                 | -  | -  | -  | +  | +  | +  | -  | -  | -  | -  | -  | -  | -  | -  | -  |
| wgs | <i>Bacillus thuringiensis</i> serovar andalousiensis (BGSC 4AW1)  | -  | -  | -  | +  | +  | +  | -  | -  | -  | -  | -  | -  | -  | -  | -  |
| wgs | <i>Bacillus thuringiensis</i> serovar monterrey (BGSC 4AJ1)       | -  | -  | -  | +  | +  | +  | -  | -  | -  | -  | -  | -  | -  | -  | -  |
| wgs | <i>Bacillus thuringiensis</i> serovar pondicheriensis (BGSC 4BA1) | -  | -  | -  | +  | +  | +  | -  | -  | -  | -  | -  | -  | -  | -  | -  |
| wgs | <i>Bacillus thuringiensis</i> serovar pulsienis (BGSC 4CC1)       | -  | -  | -  | +  | +  | +  | -  | -  | -  | -  | -  | -  | -  | -  | -  |
| -   | <i>Bacillus thuringiensis</i> str. 97-27 (CIP 105674)             | -  | -  | -  | +  | +  | +  | -  | -  | -  | -  | -  | -  | -  | -  | -  |
| wgs | <i>Bacillus cereus</i> SJ1 (NRRL B-59452)                         | -  | -  | -  | +  | +  | +  | -  | -  | -  | -  | -  | -  | -  | -  | -  |
| wgs | <i>Bacillus cereus</i> NVH0597-99                                 | -  | -  | -  | +  | +  | +  | -  | -  | -  | -  | -  | -  | -  | -  | -  |
| wgs | <i>Bacillus cereus</i> (ATCC 4342)                                | -  | -  | -  | -  | -  | -  | +  | +  | +  | -  | -  | -  | -  | -  | -  |
| wgs | <i>Bacillus thuringiensis</i> serovar tochiensis (BGSC 4Y1)       | -  | -  | -  | -  | -  | -  | +  | +  | +  | -  | -  | -  | -  | -  | -  |
| wgs | <i>Bacillus thuringiensis</i> serovar huazhongensis (BGSC 4BD1)   | -  | -  | -  | -  | -  | -  | -  | -  | -  | +  | -  | +  | -  | -  | -  |
| wgs | <i>Bacillus thuringiensis</i> serovar israelensis (ATCC 35646)    | -  | -  | -  | -  | -  | -  | -  | -  | -  | +  | +  | +  | -  | -  | -  |
| wgs | <i>Bacillus cereus</i> , ATCC 10876 (NCTC 7464)                   | -  | -  | -  | -  | -  | -  | -  | -  | -  | +  | -  | +  | -  | -  | -  |
| wgs | <i>Bacillus thuringiensis</i> ATCC 10792 (DSM 2046)               | -  | -  | -  | -  | -  | -  | -  | -  | -  | +  | +  | +  | -  | -  | -  |
| wgs | <i>Bacillus mycoides</i> DSM 2048 (NCTC 12974)                    | -  | -  | -  | -  | -  | -  | -  | -  | -  | -  | -  | -  | +  | -  | +  |
| -   | <i>Bacillus weihenstephanensis</i> , KBAB4 (DSM 11821)            | -  | -  | -  | -  | -  | -  | -  | -  | -  | -  | -  | -  | +  | +  | +  |
| -   | Negative control                                                  | -  | -  | -  | -  | -  | -  | -  | -  | -  | -  | -  | -  | -  | -  | -  |

T1, T2, T3, T4 and T5 are the target groups used to produce signatures and PCR-assays from.

S1, S2 and S3 represent the three PCR-primer-pairs chosen from the five signatures.

Field highlighted in green represents PCR-positive reaction, as expected from PCR-design.

Field highlighted in orange represents PCR-negative reaction, as expected from PCR design.

Field highlighted in red represents PCR-negative reaction, in contradiction to the positive results expected from PCR-design
