# Supplementary material for: Gegenees: Fragmented Alignment of Multiple Genomes for Determining Phylogenomic Distances and Genetic Signatures Unique for Specified Target Groups
Source: PubMed Central journal article supplement (PMC3377601; doi:10.1371/journal.pone.0039107), 2012-06-18
Supplement: pone.0039107.s014.pdf [file pone.0039107.s014.pdf]

Supplemental Table S5

A list of Foot and Mouth disease Virus (FMDV) genomes used in the serotype comparisons.

| Genome                                                       | State    | No. of. subsequences/contigs | NCBI accession number |
|--------------------------------------------------------------|----------|------------------------------|-----------------------|
| Footandmouth disease virus type Asia 1 Str vaccine IND 63 72 | Complete | 2                            | AY304994, NC_004915   |
| Footandmouth disease virus O UKG 9443 2001 Str UKG 9443 2001 | Complete | 1                            | EF552695              |
| Footandmouth disease virus type O Iso o1argentina iso5       | Complete | 1                            | AY593814              |
| Footandmouth disease virus type A Iso IND 447 2005           | Complete | 1                            | HQ832583              |
| Footandmouth disease virus type A Iso a16belem iso80         | Complete | 1                            | AY593756              |
| Footandmouth disease virus type A Iso a10holland iso82       | Complete | 2                            | NC_011450, AY593751   |
| Footandmouth disease virus type A Iso a22turkey iso66        | Complete | 1                            | AY593765              |
| Footandmouth disease virus type O Iso WFL                    | Complete | 1                            | EF175732              |
| Footandmouth disease virus type O Iso MAY 8 2005             | Complete | 1                            | HQ632771              |
| Footandmouth disease virus type O Iso UKG 417 2001           | Complete | 1                            | FJ542365              |
| Footandmouth disease virus type Asia 1 Iso IND 116 90        | Complete | 1                            | DQ989305              |
| Footandmouth disease virus type O Iso o11indonesia iso52     | Complete | 1                            | AY593813              |
| Footandmouth disease virus type C Iso C S8p260p3d            | Complete | 1                            | DQ409185              |
| Footandmouth disease virus type C Iso C S8p260d417           | Complete | 1                            | DQ409183              |
| Footandmouth disease virus type O Str UKG 15101 2001         | Complete | 1                            | DQ404158              |
| Footandmouth disease virus type A Iso a3mecklenburg iso81    | Complete | 1                            | AY593776              |
| Footandmouth disease virus type O Iso UKG 2000 2001          | Complete | 1                            | FJ542369              |
| Footandmouth disease virus type O Iso Israel 07 6389         | Complete | 1                            | FJ175664              |
| Footandmouth disease virus type O Iso o10phil76 iso76        | Complete | 1                            | AY593812              |
| Footandmouth disease virus type SAT 1 Iso sat1 20 iso11      | Complete | 1                            | AY593839              |
| Footandmouth disease virus type O Str China 1 99Tibet        | Complete | 1                            | AF506822              |
| Footandmouth disease virus type Asia 1 Iso MAY 9 99          | Complete | 1                            | HQ632774              |
| Footandmouth disease virus type A Iso IND 437 2008           | Complete | 1                            | HQ832591              |
| Footandmouth disease virus type O Str UKG 438 2001           | Complete | 1                            | DQ404174              |
| Footandmouth disease virus O ES 2001 Iso O ES 2001           | Complete | 1                            | AY686687              |
| Footandmouth disease virus type A Iso a22iraq 95 iso95       | Complete | 1                            | AY593762              |
| Footandmouth disease virus type C Iso H595                   | Complete | 1                            | AM409325              |
| Footandmouth disease virus type O Str UKG 7675 2001          | Complete | 1                            | DQ404170              |
| Footandmouth disease virus type A Iso a14 spain iso39        | Complete | 1                            | AY593754              |
| Footandmouth disease virus type C Iso C S8p460d951           | Complete | 1                            | DQ409190              |
| Footandmouth disease virus type Asia 1 Str ZB CHA 58att      | Complete | 1                            | DQ533483              |
| Footandmouth disease virus type A Iso IND 88 2006            | Complete | 1                            | HQ832588              |
| Footandmouth disease virus type O Str UKG 11 2001            | Complete | 1                            | DQ404180              |
| Footandmouth disease virus type A Iso a13brazil iso75        | Complete | 1                            | AY593753              |
| Footandmouth disease virus type Asia 1 Iso IND 423 01        | Complete | 1                            | DQ989319              |
| Footandmouth disease virus type SAT 1 Iso sat1 1bech iso30   | Complete | 2                            | AY593838, NC_011451   |
| Footandmouth disease virus type A Str IND17 82               | Complete | 1                            | HM854024              |
| Footandmouth disease virus type SAT 1 Iso sat1 4srhod iso24  | Complete | 1                            | AY593841              |
| Footandmouth disease virus type O Iso MAY 7 2001             | Complete | 1                            | HQ632769              |
| Footandmouth disease virus type O Iso UKG 1558 2001          | Complete | 1                            | FJ542367              |
| Footandmouth disease virus type O Iso PAK 44 2008            | Complete | 1                            | GU384682              |
| Footandmouth disease virus type SAT 1 Iso sat1rhod iso33     | Complete | 1                            | AY593846              |
| Footandmouth disease virus type O Iso otaiwan97 iso106 112   | Complete | 1                            | AY593835              |
| Footandmouth disease virus type Asia 1 Iso asia1 1pak iso3   | Complete | 1                            | AY593795              |

## Sheet1

|                            |                                   |          |   |                                     |
|----------------------------|-----------------------------------|----------|---|-------------------------------------|
| Footandmouth disease virus | type SAT 3 Iso sat3 3bech iso29   | Complete | 1 | AY593851                            |
| Footandmouth disease virus | type A Iso IND 249 2004           | Complete | 1 | HQ832582                            |
| Footandmouth disease virus | type SAT 2 Str unknown            | Complete | 1 | AF540910 AF136607 AF283442 AF283459 |
| Footandmouth disease virus | type A Iso IND 64 2004            | Complete | 1 | HQ832581                            |
| Footandmouth disease virus | type O Iso Tibet CHA 99           | Complete | 1 | AJ539138                            |
| Footandmouth disease virus | type Asia 1 Str Asia1 WHN CHA 06  | Complete | 1 | FJ906802                            |
| Footandmouth disease virus | type O Iso Israel 07 6378         | Complete | 1 | FJ175661                            |
| Footandmouth disease virus | C3 Iso c3resende iso1             | Complete | 1 | AY593807                            |
| Footandmouth disease virus | type O Iso o2brescia iso17        | Complete | 1 | AY593826                            |
| Footandmouth disease virus | HKN 2002 Str HKN 2002             | Complete | 1 | AY317098 AF525458 AY152808          |
| Footandmouth disease virus | type O Iso o1canefa iso59         | Complete | 1 | AY593820                            |
| Footandmouth disease virus | O UKG 4141 2001 Str UKG 4141 2001 | Complete | 1 | EF552689                            |
| Footandmouth disease virus | type Asia 1 Iso IND 182 02        | Complete | 1 | DQ989320                            |
| Footandmouth disease virus | type O Iso o1skr iso85            | Complete | 1 | AY593824                            |
| Footandmouth disease virus | type O Iso orey iran iso53        | Complete | 1 | AY593834                            |
| Footandmouth disease virus | type Asia 1 Iso IND 81 86         | Complete | 1 | DQ989306                            |
| Footandmouth disease virus | type Asia 1 Iso IND 61 02         | Complete | 1 | DQ989318                            |
| Footandmouth disease virus | type Asia 1 Iso IND 52 87         | Complete | 1 | DQ989313                            |
| Footandmouth disease virus | type O Iso o6pirbright iso58      | Complete | 1 | AY593829                            |
| Footandmouth disease virus | type C Iso C S8p360d951           | Complete | 1 | DQ409187                            |
| Footandmouth disease virus | type O Str UKG 9788 2001          | Complete | 1 | DQ404166                            |
| Footandmouth disease virus | type A Iso a5westerwald iso73     | Complete | 1 | AY593781                            |
| Footandmouth disease virus | type O Iso UKG 2640 2001          | Complete | 1 | FJ542372                            |
| Footandmouth disease virus | type O Str UKG 173 2001           | Complete | 1 | DQ404175                            |
| Footandmouth disease virus | type O Iso UKG 1734 2001          | Complete | 1 | FJ542368                            |
| Footandmouth disease virus | type O Str UKG 9327 2001          | Complete | 1 | DQ404167                            |
| Footandmouth disease virus | type A Str IND40 00               | Complete | 1 | HM854025                            |
| Footandmouth disease virus | O UKG 7039 2001 Str UKG 7039 2001 | Complete | 1 | EF552690                            |
| Footandmouth disease virus | type O Iso o10phil54 iso54        | Complete | 1 | AY593811                            |
| Footandmouth disease virus | type O Iso o3venezuela iso15      | Complete | 1 | AY593827                            |
| Footandmouth disease virus | type C Str C S8                   | Complete | 2 | NC_002554, AF274010                 |
| Footandmouth disease virus | type C Iso C S8p360d417           | Complete | 1 | DQ409186                            |
| Footandmouth disease virus | type O Str UKG 14339 2001         | Complete | 1 | DQ404163                            |
| Footandmouth disease virus | type C Iso C S8p360p5d            | Complete | 1 | DQ409188                            |
| Footandmouth disease virus | type A Iso a27columbia iso78      | Complete | 1 | AY593771                            |
| Footandmouth disease virus | type C Iso C S8p260d999           | Complete | 1 | DQ409184                            |
| Footandmouth disease virus | type O Iso o7poland iso49         | Complete | 1 | AY593830                            |
| Footandmouth disease virus | type O Str UKG 220 2001           | Complete | 1 | DQ404173                            |
| Footandmouth disease virus | type C Str C S8p200               | Complete | 1 | FJ824812                            |
| Footandmouth disease virus | type A Iso a24 argentina iso9     | Complete | 1 | AY593767                            |
| Footandmouth disease virus | type Asia 1 Iso IND 82 96         | Complete | 1 | DQ989309                            |
| Footandmouth disease virus | type Asia 1 Iso IND 47 93         | Complete | 1 | DQ989315                            |
| Footandmouth disease virus | type A Iso IND 22 2006            | Complete | 1 | HQ832584                            |
| Footandmouth disease virus | type Asia 1 Iso IND 321 01        | Complete | 1 | AY687333                            |
| Footandmouth disease virus | type Asia 1 Iso asia1leb83 iso28  | Complete | 1 | AY593800                            |
| Footandmouth disease virus | type Asia 1 Iso IND 21 89         | Complete | 1 | DQ989316                            |
| Footandmouth disease virus | type O Iso UKG 35 2001            | Complete | 1 | AJ539141                            |
| Footandmouth disease virus | type Asia 1 Iso Asia1 YS CHA 05   | Complete | 1 | GU931682                            |

Sheet1

|                            |                                      |          |   |          |
|----------------------------|--------------------------------------|----------|---|----------|
| Footandmouth disease virus | type SAT 1 Iso sat1 3swa iso14       | Complete | 1 | AY593840 |
| Footandmouth disease virus | type O Iso o1campos iso96            | Complete | 1 | AY593818 |
| Footandmouth disease virus | type Asia 1 Iso asia1 2isrl3 63 iso6 | Complete | 1 | AY593796 |
| Footandmouth disease virus | type O Str UKG 14603 2001            | Complete | 1 | DQ404159 |
| Footandmouth disease virus | type O Str UKG 14524 2001            | Complete | 1 | DQ404160 |
| Footandmouth disease virus | type A Iso a2spain iso7              | Complete | 1 | AY593774 |
| Footandmouth disease virus | type Asia 1 Iso IND 13 91            | Complete | 1 | DQ989312 |
| Footandmouth disease virus | O UKG 9161 2001 Str UKG 9161 2001    | Complete | 1 | EF552691 |
| Footandmouth disease virus | O UKG 4998 2001 Str UKG 4998 2001    | Complete | 1 | EF552694 |
| Footandmouth disease virus | type SAT 1 Iso sat1 6swa iso16       | Complete | 1 | AY593843 |
| Footandmouth disease virus | type Asia 1 Iso IND 354 01           | Complete | 1 | DQ989314 |
| Footandmouth disease virus | type O Iso UKG 2526 2001             | Complete | 1 | FJ542371 |
| Footandmouth disease virus | type A Iso IND 161 2003              | Complete | 1 | HQ832578 |
| Footandmouth disease virus | type A Iso a18zulia iso40            | Complete | 1 | AY593758 |
| Footandmouth disease virus | type A Iso a25 argentina iso38       | Complete | 1 | AY593769 |
| Footandmouth disease virus | C3 Iso c3ind iso19                   | Complete | 1 | AY593806 |
| Footandmouth disease virus | type Asia 1 Iso asia1leb4 iso4       | Complete | 1 | AY593799 |
| Footandmouth disease virus | type O Str UKG 14391 2001            | Complete | 1 | DQ404161 |
| Footandmouth disease virus | type O Str UKG 4569 2001             | Complete | 1 | DQ404171 |
| Footandmouth disease virus | type O Str UKG 8098 2001             | Complete | 1 | EU214601 |
| Footandmouth disease virus | type A Iso IND 21 1990               | Complete | 1 | HQ832576 |
| Footandmouth disease virus | type O Iso openghu iso108            | Complete | 1 | AY593833 |
| Footandmouth disease virus | type O Str UKG 621 2001              | Complete | 1 | DQ404172 |
| Footandmouth disease virus | type A Iso aparma iso55              | Complete | 1 | AY593792 |
| Footandmouth disease virus | type Asia 1 Str Asia1 MOG 05         | Complete | 1 | EF614458 |
| Footandmouth disease virus | C1 Iso c1noville iso56               | Complete | 1 | AY593804 |
| Footandmouth disease virus | type A Iso a1bayern iso41            | Complete | 1 | AY593759 |
| Footandmouth disease virus | type O Iso O NY00                    | Complete | 1 | AY333431 |
| Footandmouth disease virus | type O Iso o1brugge iso79            | Complete | 1 | AY593817 |
| Footandmouth disease virus | type O Str Akesu 58                  | Complete | 1 | AF511039 |
| Footandmouth disease virus | type A Iso a4 W Germany iso42        | Complete | 1 | AY593777 |
| Footandmouth disease virus | type O Str UKG 11676 2001            | Complete | 1 | DQ404164 |
| Footandmouth disease virus | type A Iso a2Ussr iso10              | Complete | 1 | AY593760 |
| Footandmouth disease virus | type A Iso aabrazil iso67            | Complete | 1 | AY593788 |
| Footandmouth disease virus | O UKG 5470 2001 Str UKG 5470 2001    | Complete | 1 | EF552696 |
| Footandmouth disease virus | type SAT 2 Iso sat2 2 iso25          | Complete | 1 | AY593848 |
| Footandmouth disease virus | type SAT 1 Iso sat1bot iso47         | Complete | 1 | AY593845 |
| Footandmouth disease virus | type O Iso MAY 3 2000                | Complete | 1 | HQ632768 |
| Footandmouth disease virus | type A Iso acanefa iso48             | Complete | 1 | AY593789 |
| Footandmouth disease virus | type O Str OGBF15                    | Complete | 1 | DQ478936 |
| Footandmouth disease virus | type A Iso a28 Turkey iso44          | Complete | 1 | AY593772 |
| Footandmouth disease virus | type A Iso aargp64 iso100            | Complete | 1 | AY593785 |
| Footandmouth disease virus | type O Str UKG 126 2001              | Complete | 1 | DQ404179 |
| Footandmouth disease virus | type A Iso a argentina 2000 iso104   | Complete | 1 | AY593782 |
| Footandmouth disease virus | type O Iso o1bfs46 iso46             | Complete | 1 | AY593816 |
| Footandmouth disease virus | type C Iso C S8p460d417              | Complete | 1 | DQ409189 |
| Footandmouth disease virus | type Asia 1 Iso IND 101 99           | Complete | 1 | DQ989310 |
| Footandmouth disease virus | type A Iso a4spain iso62             | Complete | 1 | AY593778 |

## Sheet1

|                            |                                     |          |   |                     |
|----------------------------|-------------------------------------|----------|---|---------------------|
| Footandmouth disease virus | O SKR 2000 Str unknown              | Complete | 1 | AF377945            |
| Footandmouth disease virus | type Asia 1 Iso IND 334 00          | Complete | 1 | DQ989304            |
| Footandmouth disease virus | type A Iso A uruguay 2001 iso98     | Complete | 1 | AY593802            |
| Footandmouth disease virus | type A Iso IND 245 2007             | Complete | 1 | HQ832590            |
| Footandmouth disease virus | type O Iso PAK 45 2008              | Complete | 1 | GU384683            |
| Footandmouth disease virus | type O Iso SKR 2000                 | Complete | 1 | AJ539139            |
| Footandmouth disease virus | type Asia 1 Str YNBS 58             | Complete | 1 | AY390432            |
| Footandmouth disease virus | type O Iso ouk2001x iso84           | Complete | 1 | AY593836            |
| Footandmouth disease virus | type O Iso MAY 1 2004               | Complete | 1 | HQ632770            |
| Footandmouth disease virus | type O Str UKG 14476 2001           | Complete | 1 | DQ404162            |
| Footandmouth disease virus | type SAT 2 Iso sat2 3kenya 21       | Complete | 2 | NC_003992, AY593849 |
| Footandmouth disease virus | type A Iso a12valle 119 iso20       | Complete | 1 | AY593752            |
| Footandmouth disease virus | type Asia 1 Iso IND 139 02          | Complete | 1 | DQ989322            |
| Footandmouth disease virus | type O Str OGBF15 derivative        | Complete | 1 | DQ478937            |
| Footandmouth disease virus | type A Iso a22iraq64 iso86          | Complete | 1 | AY593763            |
| Footandmouth disease virus | type Asia 1 Iso IND 247 92          | Complete | 1 | DQ989307            |
| Footandmouth disease virus | type O Iso UKG 2085 2001            | Complete | 1 | FJ542370            |
| Footandmouth disease virus | type A Iso a4wg iso72               | Complete | 1 | AY593779            |
| Footandmouth disease virus | type A Iso a32ven iso36             | Complete | 1 | AY593775            |
| Footandmouth disease virus | O UKG 5681 2001 Str UKG 5681 2001   | Complete | 1 | EF552697            |
| Footandmouth disease virus | O UKG 3952 2001 Str UKG 3952 2001   | Complete | 1 | EF552688            |
| Footandmouth disease virus | type A Iso a general lopez iso102   | Complete | 1 | AY593790            |
| Footandmouth disease virus | type O Str UKG 150 2001             | Complete | 1 | DQ404176            |
| Footandmouth disease virus | type O Iso TAW 2 99 BOV             | Complete | 1 | AJ539137            |
| Footandmouth disease virus | type A Iso avenceslau iso70         | Complete | 1 | AY593803            |
| Footandmouth disease virus | type O Str China 5 99Fujian         | Complete | 1 | HQ009509            |
| Footandmouth disease virus | type A Iso a17 Aguarulbos iso83     | Complete | 1 | AY593757            |
| Footandmouth disease virus | type A Iso airan iso105             | Complete | 1 | AY593791            |
| Footandmouth disease virus | type A Iso IND 110 1999             | Complete | 1 | HQ832577            |
| Footandmouth disease virus | type O Iso MAY 7 2007               | Complete | 1 | HQ632772            |
| Footandmouth disease virus | type Asia 1 Iso asia1 3kimron iso61 | Complete | 1 | AY593797            |
| Footandmouth disease virus | C1 Iso c1ober iso88                 | Complete | 1 | AY593805            |
| Footandmouth disease virus | type O Iso Israel 07 6391           | Complete | 1 | FJ175665            |
| Footandmouth disease virus | type A Str IND17 77                 | Complete | 1 | HM854022            |
| Footandmouth disease virus | type A Iso a29peru iso37            | Complete | 1 | AY593773            |
| Footandmouth disease virus | type A Iso MAY 3 2007               | Complete | 1 | HQ632773            |
| Footandmouth disease virus | type O Iso ouruguay 51 iso51        | Complete | 1 | AY593837            |
| Footandmouth disease virus | type A Iso IND 281 2003             | Complete | 1 | HQ832579            |
| Footandmouth disease virus | type A Iso IND 818 2003             | Complete | 1 | HQ832580            |
| Footandmouth disease virus | type SAT 1 Iso sat1 5sa iso13       | Complete | 1 | AY593842            |
| Footandmouth disease virus | type O Str O YM YN 2000             | Complete | 1 | HQ412603            |
| Footandmouth disease virus | type O Str unknown                  | Complete | 2 | AF308157, NC_004004 |
| Footandmouth disease virus | C4 Iso C4 Tierra del Fuego iso2     | Complete | 1 | AY593808            |
| Footandmouth disease virus | type A Iso IND 26 2006              | Complete | 1 | HQ832585            |
| Footandmouth disease virus | type Asia 1 Iso IND 151 94          | Complete | 1 | DQ989303            |
| Footandmouth disease virus | type O Iso o1manisa iso87           | Complete | 1 | AY593823            |
| Footandmouth disease virus | type O Iso o1bfs iso18              | Complete | 1 | AY593815            |
| Footandmouth disease virus | type O Str UKG 7038 2001            | Complete | 1 | DQ404169            |

## Sheet1

|                            |                                           |          |   |                    |
|----------------------------|-------------------------------------------|----------|---|--------------------|
| Footandmouth disease virus | type A Iso aphillippines iso50            | Complete | 1 | AY593793           |
| Footandmouth disease virus | type O Iso O SKR 2000                     | Complete | 2 | AY312587, AY312586 |
| Footandmouth disease virus | type Asia 1 Iso IND 438 01                | Complete | 1 | DQ989321           |
| Footandmouth disease virus | type O Str Chu Pei                        | Complete | 1 | AF026168           |
| Footandmouth disease virus | type A Iso IND 109 2006                   | Complete | 1 | HQ832589           |
| Footandmouth disease virus | type A Iso asabana iso68                  | Complete | 1 | AY593794           |
| Footandmouth disease virus | type O Str O YS CHA 05                    | Complete | 1 | HM008917           |
| Footandmouth disease virus | type Asia 1 Iso asia1leb 89 iso89         | Complete | 1 | AY593798           |
| Footandmouth disease virus | type O Iso o1campos94 iso94               | Complete | 1 | AY593819           |
| Footandmouth disease virus | type A Iso aargp55 iso99                  | Complete | 1 | AY593784           |
| Footandmouth disease virus | type SAT 3 Iso sat3 3kenya iso22          | Complete | 1 | AY593852           |
| Footandmouth disease virus | type A Iso Lindholm 13PAK3 2006           | Complete | 1 | EF117837           |
| Footandmouth disease virus | type O Iso o1valle iso64                  | Complete | 1 | AY593825           |
| Footandmouth disease virus | type O Str UKG 9964 2001                  | Complete | 1 | DQ404165           |
| Footandmouth disease virus | type A Iso abage iso63                    | Complete | 1 | AY593787           |
| Footandmouth disease virus | type A Iso IND 43 2006                    | Complete | 1 | HQ832586           |
| Footandmouth disease virus | type O Iso O SKR 2002                     | Complete | 2 | AY312589, AY312588 |
| Footandmouth disease virus | type A Iso a24cruzeiro iso71              | Complete | 1 | AY593768           |
| Footandmouth disease virus | type O Iso SAR 19 2000                    | Complete | 1 | AJ539140           |
| Footandmouth disease virus | type A Iso a21kenya iso77                 | Complete | 1 | AY593761           |
| Footandmouth disease virus | type SAT 1 Iso sat1 7isrl iso12           | Complete | 1 | AY593844           |
| Footandmouth disease virus | type O Iso Israel 07 6382                 | Complete | 1 | FJ175663           |
| Footandmouth disease virus | type O Iso TAW 2 99 TC                    | Complete | 1 | AJ539136           |
| Footandmouth disease virus | type O Iso O UK2001 ED                    | Complete | 1 | AY593831           |
| Footandmouth disease virus | type Asia 1 Iso IND 37 02                 | Complete | 1 | DQ989311           |
| Footandmouth disease virus | type O Str UKG 128 2001                   | Complete | 1 | DQ404177           |
| Footandmouth disease virus | type C Iso C S8p460p5d                    | Complete | 1 | DQ409191           |
| Footandmouth disease virus | type O Iso O UK2001 FB                    | Complete | 1 | AY593832           |
| Footandmouth disease virus | type SAT 2 Iso sat2 1rhod iso26           | Complete | 1 | AY593847           |
| Footandmouth disease virus | type O Iso HKN 20 2010                    | Complete | 1 | HM229661           |
| Footandmouth disease virus | type O Iso o1m11 iso57                    | Complete | 1 | AY593822           |
| Footandmouth disease virus | type O Iso lz                             | Complete | 1 | DQ248888           |
| Footandmouth disease virus | type A Iso IND 17 2009                    | Complete | 1 | HQ832592           |
| Footandmouth disease virus | type A Iso IND 50 2006                    | Complete | 1 | HQ832587           |
| Footandmouth disease virus | type O Iso o1caseros iso35                | Complete | 1 | AY593821           |
| Footandmouth disease virus | type Asia 1 Iso IND 397 97                | Complete | 1 | DQ989308           |
| Footandmouth disease virus | type A Iso a15thailand iso43              | Complete | 1 | AY593755           |
| Footandmouth disease virus | type A Iso aarg Trenquelauquen iso103     | Complete | 1 | AY593786           |
| Footandmouth disease virus | O UKG 4014 2001 Str UKG 4014 2001         | Complete | 1 | EF552693           |
| Footandmouth disease virus | type A Iso a26arg iso74                   | Complete | 1 | AY593770           |
| Footandmouth disease virus | type Asia 1 Str Asia 1 Jiangsu China 2005 | Complete | 1 | EF149009           |
| Footandmouth disease virus | type O Iso UKG 1450 2001                  | Complete | 1 | FJ542366           |
| Footandmouth disease virus | type O Str O SKR 14 02                    | Complete | 1 | EF614457           |
| Footandmouth disease virus | type O Iso Israel 07 6380                 | Complete | 1 | FJ175662           |
| Footandmouth disease virus | type O Iso O1Campos                       | Complete | 1 | AJ320488           |
| Footandmouth disease virus | type O Str UKG 127 2001                   | Complete | 1 | DQ404178           |
| Footandmouth disease virus | type C Iso cwald iso32                    | Complete | 1 | AY593810           |
| Footandmouth disease virus | type Asia 1 Str IND 491 97; WBN 117 85    | Complete | 1 | AY687334           |

Sheet1

|                                                              |          |   |                     |
|--------------------------------------------------------------|----------|---|---------------------|
| Footandmouth disease virus type Asia 1 Iso IND 148 01        | Complete | 1 | DQ989317            |
| Footandmouth disease virus type A Str IND258 99              | Complete | 1 | HM854023            |
| Footandmouth disease virus O UKG 7299 2001 Str UKG 7299 2001 | Complete | 1 | EF552692            |
| Footandmouth disease virus type A Iso A30 Uruguay 68 iso90   | Complete | 1 | AY593801            |
| Footandmouth disease virus type A Iso a5allier iso45         | Complete | 1 | AY593780            |
| Footandmouth disease virus type A Iso aarg2001 iso93         | Complete | 1 | AY593783            |
| Footandmouth disease virus type A Str IND81 00               | Complete | 1 | HM854021            |
| Footandmouth disease virus type O Str UKG 9011 2001          | Complete | 1 | DQ404168            |
| Footandmouth disease virus type O Str OMIII                  | Complete | 1 | AY359854            |
| Footandmouth disease virus C5 Iso c5arg iso60                | Complete | 1 | AY593809            |
| Footandmouth disease virus type O Iso o5india iso34          | Complete | 1 | AY593828            |
| Footandmouth disease virus type SAT 3 Iso sat3 4bech iso23   | Complete | 1 | AY593853            |
| Footandmouth disease virus type Asia 1 Str Asia 1 HNK CHA 05 | Complete | 1 | EF149010            |
| Footandmouth disease virus type A Iso a22iraq70 iso92        | Complete | 1 | AY593764            |
| Footandmouth disease virus type O Iso Israel 07 6387         | Complete | 1 | FJ175666            |
| Footandmouth disease virus type SAT 3 Iso sat3 2sa iso27     | Complete | 2 | AY593850, NC_011452 |
| Footandmouth disease virus type A Iso a23kenya iso8          | Complete | 1 | AY593766            |
| Footandmouth disease virus type Asia 1 Iso IND 97 03         | Complete | 1 | DQ989323            |
