# Supplementary material for: Gegenees: Fragmented Alignment of Multiple Genomes for Determining Phylogenomic Distances and Genetic Signatures Unique for Specified Target Groups
Source: PubMed Central journal article supplement (PMC3377601; doi:10.1371/journal.pone.0039107), 2012-06-18
Supplement: pone.0039107.s015.pdf [file pone.0039107.s015.pdf]

Supplemental Table S6

A list of *Escherichia* Spp. genomes used in the *Escherichia* comparison.

| Genome                              | State    | No. of. subsequences/contigs | NCBI accession number                                 |
|-------------------------------------|----------|------------------------------|-------------------------------------------------------|
| Escherichia coli K 12 substr MG1655 | Complete | 1                            | NC_000913                                             |
| Escherichia coli MS 187 1           | Draft    | 310                          | NZ_AD TQ                                              |
| Escherichia coli MS 116 1           | Draft    | 484                          | NZ_AD TZ                                              |
| Escherichia coli 2362 75            | Draft    | 83                           | NZ_AD UL                                              |
| Escherichia coli O157 H7 EC508      | Draft    | 272                          | NZ_AB HW                                              |
| Escherichia coli MS 124 1           | Draft    | 176                          | NZ_AD WT                                              |
| Escherichia coli O157 H7 EC4042     | Draft    | 4                            | NZ_AB HM                                              |
| Escherichia coli MS 78 1            | Draft    | 410                          | NZ_AD TY                                              |
| Escherichia coli MS 196 1           | Draft    | 785                          | NZ_AD UD                                              |
| Escherichia coli S88                | Complete | 2                            | NC_011742, NC_011747                                  |
| Escherichia coli B354               | Draft    | 69                           | ACXG                                                  |
| Escherichia coli O157 H7 Sakai      | Complete | 3                            | NC_002127, NC_002695, NC_002128                       |
| Escherichia coli O157 H7 EC4045     | Draft    | 8                            | NZ_AB HL                                              |
| Escherichia coli MS 69 1            | Draft    | 425                          | NZ_AD TP                                              |
| Escherichia coli ATCC 8739          | Complete | 1                            | NC_010468                                             |
| Escherichia coli 1827 70            | Draft    | 35                           | NZ_AD UK                                              |
| Escherichia coli MS 115 1           | Draft    | 423                          | NZ_AD TL                                              |
| Escherichia coli O157 H7 TW14588    | Draft    | 10                           | NZ_AB KY                                              |
| Escherichia coli CFT073             | Complete | 1                            | NC_004431                                             |
| Escherichia coli K 12 substr DH10B  | Complete | 1                            | NC_010473                                             |
| Escherichia coli B REL606           | Complete | 1                            | NC_012967                                             |
| Escherichia coli M718               | Draft    | 188                          | ADAW                                                  |
| Escherichia coli MS 21 1            | Draft    | 540                          | NZ_AD TR                                              |
| Escherichia coli W                  | Draft    | 88                           | NZ_AEDF                                               |
| Escherichia coli MS 145 7           | Draft    | 143                          | NZ_AD WS                                              |
| Escherichia coli TA206              | Draft    | 187                          | ADAX                                                  |
| Escherichia coli OP50               | Draft    | 2939                         | NZ_ADBT                                               |
| Escherichia coli O157 H7 FRIK2000   | Draft    | 247                          | NZ_AC XO                                              |
| Escherichia 3 2 53FAA               | Draft    | 173                          | ACAC                                                  |
| Escherichia coli O157 H7 EDL933     | Complete | 2                            | NC_007414, NC_002655                                  |
| Escherichia coli MS 107 1           | Draft    | 72                           | NZ_AD WV                                              |
| Escherichia coli O26 H11 11368      | Complete | 5                            | NC_013361, NC_014543, NC_013363, NC_013369, NC_013362 |
| Escherichia coli O157 H7 EC4486     | Draft    | 165                          | NZ_AB HS                                              |
| Escherichia coli TA271              | Draft    | 191                          | ADAZ                                                  |
| Escherichia coli H299               | Draft    | 229                          | ADBC                                                  |
| Escherichia coli MS 198 1           | Draft    | 564                          | NZ_AD TJ                                              |
| Escherichia coli IA1                | Complete | 1                            | NC_011741                                             |
| Escherichia fergusonii ATCC 35469   | Complete | 2                            | NC_011740, NC_011743                                  |
| Escherichia coli O157 H7 EC4076     | Draft    | 135                          | NZ_AB HQ                                              |
| Escherichia coli O157 H7 EC4501     | Draft    | 250                          | NZ_AB HT                                              |
| Escherichia coli O157 H7 EC4401     | Draft    | 186                          | NZ_AB HR                                              |
| Escherichia coli 101 1              | Draft    | 91                           | NZ_AA MK                                              |
| Escherichia coli O127 H6 E2348 69   | Complete | 3                            | NC_011603, NC_011601, NC_011602                       |
| Escherichia coli O55 H7 CB9615      | Complete | 2                            | NC_013941, NC_013942                                  |

Sheet1

|                                         |          |     |                                                                             |
|-----------------------------------------|----------|-----|-----------------------------------------------------------------------------|
| Escherichia coli MS 182 1               | Draft    | 456 | NZ_ADTM                                                                     |
| Escherichia coli MS 146 1               | Draft    | 355 | NZ_ADTN                                                                     |
| Escherichia coli MS 119 7               | Draft    | 130 | NZ_ADWU                                                                     |
| Escherichia coli E24377A                | Complete | 7   | NC_009789, NC_009786, NC_009801, NC_009788, NC_009787, NC_009790, NC_009791 |
| Escherichia coli O157 H7 EC869          | Draft    | 147 | NZ_ABHU                                                                     |
| Escherichia coli MS 185 1               | Draft    | 378 | NZ_ADUE                                                                     |
| Escherichia coli O157 H7 EC4024         | Draft    | 364 | NZ_ABJT                                                                     |
| Escherichia coli MS 84 1                | Draft    | 432 | NZ_ADTK                                                                     |
| Escherichia albertii TW07627            | Draft    | 64  | NZ_ABKX                                                                     |
| Escherichia coli O157 H7 EC4206         | Draft    | 7   | NZ_ABHK                                                                     |
| Escherichia coli FVEC1302               | Draft    | 149 | ACXH                                                                        |
| Escherichia coli B088                   | Draft    | 148 | ACXE                                                                        |
| Escherichia coli NC101                  | Draft    | 27  | NZ_AEFA                                                                     |
| Escherichia coli APEC O1                | Complete | 3   | NC_008563, NC_009837, NC_009838                                             |
| Escherichia coli H591                   | Draft    | 190 | ADBB                                                                        |
| Escherichia coli TA280                  | Draft    | 168 | ADBA                                                                        |
| Escherichia coli B185                   | Draft    | 115 | ACXF                                                                        |
| Escherichia coli UMN026                 | Complete | 3   | NC_011739, NC_011749, NC_011751                                             |
| Escherichia coli H736                   | Draft    | 135 | ADAU                                                                        |
| Escherichia coli BW2952                 | Complete | 1   | NC_012759                                                                   |
| Escherichia coli SMS 3 5                | Complete | 5   | NC_010488, NC_010487, NC_010485, NC_010486, NC_010498                       |
| Escherichia coli O103 H2 12009          | Complete | 2   | NC_013353, NC_013354                                                        |
| Escherichia coli 53638                  | Draft    | 2   | NZ_AAKB                                                                     |
| Escherichia coli UT189                  | Complete | 2   | NC_007941, NC_007946                                                        |
| Escherichia coli MS 45 1                | Draft    | 396 | NZ_ADTO                                                                     |
| Escherichia coli 536                    | Complete | 1   | NC_008253                                                                   |
| Escherichia coli B7A                    | Draft    | 289 | NZ_AAJT                                                                     |
| Escherichia coli 83972                  | Draft    | 159 | NZ_ACGN                                                                     |
| Escherichia coli 55989                  | Complete | 1   | NC_011748                                                                   |
| Escherichia coli O157 H7 TW14359        | Complete | 2   | NC_013010, NC_013008                                                        |
| Escherichia coli O111 H 11128           | Complete | 6   | NC_013364, NC_013365, NC_013368, NC_013367, NC_013366, NC_013370            |
| Escherichia coli O157 H7 FRIK966        | Draft    | 316 | NZ_ACXN                                                                     |
| Escherichia coli BL21 Gold DE3 pLysS AG | Complete | 1   | NC_012947                                                                   |
| Escherichia coli FVEC1412               | Draft    | 137 | ACXI                                                                        |
| Escherichia coli E22                    | Draft    | 127 | NZ_AAJV                                                                     |
| Escherichia coli O157 H7 EC4113         | Draft    | 231 | NZ_ABHP                                                                     |
| Escherichia coli ED1a                   | Complete | 1   | NC_011745                                                                   |
| Escherichia coli O157 H7 EC4115         | Complete | 3   | NC_011350, NC_011353, NC_011351                                             |
| Escherichia coli O157 H7 EC4196         | Draft    | 186 | NZ_ABHO                                                                     |
| Escherichia coli MS 175 1               | Draft    | 413 | NZ_ADUB                                                                     |
| Escherichia coli IA139                  | Complete | 1   | NC_011750                                                                   |
| Escherichia 4 1 40B                     | Draft    | 126 | NZ_ACDM                                                                     |
| Escherichia coli TA143                  | Draft    | 168 | ADAY                                                                        |
| Escherichia coli SE11                   | Complete | 7   | NC_011416, NC_011415, NC_011419, NC_011408, NC_011411, NC_011413, NC_011407 |
| Escherichia coli B171                   | Draft    | 262 | NZ_AAJX                                                                     |
| Escherichia coli MS 200 1               | Draft    | 445 | NZ_ADUC                                                                     |
| Escherichia coli M605                   | Draft    | 162 | ADAV                                                                        |
| Escherichia coli HS                     | Complete | 1   | NC_009800                                                                   |

Sheet1

|                                       |       |     |         |
|---------------------------------------|-------|-----|---------|
| Escherichia 1 1 43                    | Draft | 91  | ACID    |
| Escherichia coli F11                  | Draft | 119 | NZ_AAJU |
| Escherichia coli E110019              | Draft | 137 | NZ_AAJW |
| Escherichia coli O104 H4 str 01 09591 | Draft | 287 | AFPS    |
| Escherichia coli O104 H4 str LB226692 | Draft | 356 | AFOB    |
