# Supplementary material for: Gegenees: Fragmented Alignment of Multiple Genomes for Determining Phylogenomic Distances and Genetic Signatures Unique for Specified Target Groups
Source: PubMed Central journal article supplement (PMC3377601; doi:10.1371/journal.pone.0039107), 2012-06-18
Supplement: pone.0039107.s016.pdf [file pone.0039107.s016.pdf]

**Supplemental Table S7****A list of *Escherichia* Spp. plasmids used in the *Escherichia* comparison.**

| <b>Genome</b>                         | <b>State</b> | <b>No. of. subsequences/contigs</b> | <b>NCBI accession number</b> |
|---------------------------------------|--------------|-------------------------------------|------------------------------|
| Escherichia coli O104 H4 str 01 09591 | Draft        | 287                                 | AFPS                         |
| Escherichia coli O104 H4 str LB226692 | Draft        | 356                                 | AFOB                         |
| pAPEC-O1-R                            | Complete     | 1                                   | NC_009838                    |
| pR751                                 | Complete     | 1                                   | NC_001735                    |
| pEK204                                | Complete     | 1                                   | EU935740                     |
| pMT-1                                 | Complete     | 1                                   | AF074611                     |
| pK29                                  | Complete     | 1                                   | EF382672                     |
| pOLA52                                | Complete     | 1                                   | EU370913 AY241669 AY835616   |
| pCTXM360                              | Complete     | 1                                   | NC_011641                    |
| pC15-1a                               | Complete     | 1                                   | AY458016                     |
| pEK516                                | Complete     | 1                                   | EU935738                     |
| pSERB1                                | Complete     | 1                                   | AY686591                     |
| pR46                                  | Complete     | 1                                   | AY046276 AF117344            |
| pHCM1                                 | Complete     | 1                                   | NC_003384                    |
| pEC L8                                | Complete     | 1                                   | GU371928                     |
| pR621a                                | Complete     | 1                                   | AP011954                     |
| pMAR7                                 | Complete     | 1                                   | DQ388534                     |
| pAA O42                               | Complete     | 1                                   | FN554767                     |
| pO103                                 | Complete     | 1                                   | NC_013354                    |
| pCTX M3                               | Complete     | 1                                   | AF550415                     |
| pEC B24                               | Complete     | 1                                   | GU371926                     |
| pETEC 6                               | Complete     | 1                                   | NC_009789                    |
| pR27                                  | Complete     | 1                                   | AF250878                     |
| pR7K                                  | Complete     | 1                                   | NC_010643                    |
| pMUR050                               | Complete     | 1                                   | AY522431                     |
| pCoo                                  | Complete     | 1                                   | NC_007635                    |
| pKP96                                 | Complete     | 1                                   | EU195449                     |
| pO157                                 | Complete     | 1                                   | AF074613                     |
| pUTI89                                | Complete     | 1                                   | NC_007941                    |
| p55989                                | Complete     | 1                                   | NC_011752                    |
| pJP4                                  | Complete     | 1                                   | NC_005912                    |
| pEC Bactec                            | Complete     | 1                                   | GU371927                     |

Sheet1

|            |          |   |           |
|------------|----------|---|-----------|
| pEC4115    | Complete | 1 | NC_011351 |
| pEC L46    | Complete | 1 | GU371929  |
| pEK499     | Complete | 1 | EU935739  |
| pB171      | Complete | 1 | AB024946  |
| pWR501     | Complete | 1 | AF348706  |
| pR478      | Complete | 1 | BX664015  |
| pEL60      | Complete | 1 | NC_005246 |
| pEntH10407 | Complete | 1 | NC_013507 |
| p1081      | Complete | 1 | NC_014232 |
